# Supplementary material
Source: HighWire-hosted journal article supplement (https://cmaj.ca/highwire/filestream/59173/field_highwire_adjunct_files/0/clari-garg-1-at.pdf)
Supplement: clari-garg-1-at.pdf [file clari-garg-1-at.pdf]

**Appendix 1** (as supplied by the authors): Coding definitions for demographic and comorbid conditions

| Characteristics                                                                                                                                                                                                                                                                                                                                                                                                                                      | Database          | Codes                                                                                                                                                                                                                                                               |
|------------------------------------------------------------------------------------------------------------------------------------------------------------------------------------------------------------------------------------------------------------------------------------------------------------------------------------------------------------------------------------------------------------------------------------------------------|-------------------|---------------------------------------------------------------------------------------------------------------------------------------------------------------------------------------------------------------------------------------------------------------------|
| Age                                                                                                                                                                                                                                                                                                                                                                                                                                                  | RPDB              |                                                                                                                                                                                                                                                                     |
| Sex                                                                                                                                                                                                                                                                                                                                                                                                                                                  | RPDB              |                                                                                                                                                                                                                                                                     |
| Socioeconomic status                                                                                                                                                                                                                                                                                                                                                                                                                                 | Statistics Canada |                                                                                                                                                                                                                                                                     |
| Chronic kidney disease                                                                                                                                                                                                                                                                                                                                                                                                                               | CIHI-DAD          | <b>ICD-9</b> 4030, 4031, 4039, 4040, 4041, 4049, 585, 586, 5888, 5889, 25040.<br><b>ICD-10</b> E102, E112, E132, E142, I12, I13, N08, N18, N19.                                                                                                                     |
|                                                                                                                                                                                                                                                                                                                                                                                                                                                      | OHIP              | 403, 585.                                                                                                                                                                                                                                                           |
| Coronary artery disease                                                                                                                                                                                                                                                                                                                                                                                                                              | CIHI-DAD          | <b>ICD-9</b> 412, 410, 414, 4292, 4295, 4296, 4297.<br><b>ICD-10</b> I21, I22, I23, I24, I25, Z955, Z958, Z959, R931, T822.<br><b>CCI</b> 1I26, 1I27, 1I54, 1I57, 1I50, 1I76.<br><b>CCP</b> 4801, 4802, 4803, 4804, 4805, 481, 482, 483.                            |
|                                                                                                                                                                                                                                                                                                                                                                                                                                                      | OHIP              | R741, R742, R743, G298, E646, E651, E652, E654, E655, G262, Z434, Z448, 410, 412.                                                                                                                                                                                   |
| Peripheral vascular disease                                                                                                                                                                                                                                                                                                                                                                                                                          | CIHI-DAD          | <b>ICD-9</b> 4402, 4408, 4409, 5571, 4439, 444.<br><b>ICD-10</b> I700, I702, I708, I709, I731, I738, I739, K551.<br><b>CCP</b> 5125, 5129, 5014, 5016, 5018, 5028, 5038.<br><b>CCI</b> 1KA76, 1KA50, 1KE76, 1KG26, 1KG50, 1KG57, 1KG76MI, 1KG87.                    |
|                                                                                                                                                                                                                                                                                                                                                                                                                                                      | OHIP              | R787, R780, R797, R804, R809, R875, R815, R936, R783, R784, R785, E626, R814, R786, R937, R860, R861, R855, R856, R933, R934, R791, E672, R794, R813, R867, E649.                                                                                                   |
| Heart failure                                                                                                                                                                                                                                                                                                                                                                                                                                        | CIHI-DAD          | <b>ICD-9</b> 425, 5184, 514, 428.<br><b>ICD-10</b> I500, I501, I509, I255, J81. CCP 4961, 4962, 4963, 4964.<br><b>CCI</b> 1HP53, 1HP55, 1HZ53GRFR, 1HZ53LAFR, 1HZ53SYFR.                                                                                            |
|                                                                                                                                                                                                                                                                                                                                                                                                                                                      | OHIP              | R701, R702, Z429, 428.                                                                                                                                                                                                                                              |
| Stroke/transient ischemic attack                                                                                                                                                                                                                                                                                                                                                                                                                     | CIHI-DAD          | <b>ICD-9</b> 430, 431, 434, 435, 436.<br><b>ICD-10</b> I630, I631, I632, I633, I634, I635, I638, I639, I64, H341, I600, I601, I602, I603, I604, I605, I606, I607, I609, I61, G450, G451, G452, G453, G458, G459.                                                    |
| Major cancers                                                                                                                                                                                                                                                                                                                                                                                                                                        | CIHI-DAD          | <b>ICD-9</b> 150, 154, 155, 157, 162, 174, 175, 185, 203, 204, 205, 206, 207, 208.<br><b>ICD-10</b> 971, 980, 982, 984, 985, 986, 987, 988, 989, 990, 991, 993, C15, C18, C19, C20, C22, C25, C34, C50, C56, C61, C82, C83, C85, C91, C92, C93, C94, C95, D00, D05. |
|                                                                                                                                                                                                                                                                                                                                                                                                                                                      | OHIP              | 203, 204, 205, 206, 207, 208, 150, 154, 155, 157, 162, 174, 175, 183, 185.                                                                                                                                                                                          |
| CCI = Canadian Classification of Health Interventions; CCP = Canadian Classification of Diagnostic, Therapeutic and Surgical Procedures; CIHI DAD = Canadian Institute for Health Information Discharge Abstract Database; ICD-9 = International Classification of Diseases, Ninth Revision; ICD-10 = International Classification of Diseases, Tenth Revision; OHIP = Ontario Health Insurance Plan; RPDB = Registered Persons Database of Ontario. |                   |                                                                                                                                                                                                                                                                     |
